# Supplementary material for: Mobilization of IMEs Integrated in the oriT of ICEs Involves Their Own Relaxase Belonging to the Rep-Trans Family of Proteins
Source: MDPI journal article supplement (doi:10.3390/genes11091004), 2020-08-26
Supplement: s1 [file s1]

**TABLE S1.** Primers used in this work.

| Primer use                                                       | Primer designation<br>(number for figure 2) | Sequence (5' to 3')                                                   | Product size<br>(pb) | Reference  |
|------------------------------------------------------------------|---------------------------------------------|-----------------------------------------------------------------------|----------------------|------------|
| IME_ <i>Ssal</i> L25_oriT labelling                              |                                             |                                                                       |                      |            |
|                                                                  | IMEoriT_1                                   | CACCACTCAAACCTGTCATAAA                                                |                      | This study |
|                                                                  | IMEoriT_2km                                 | aacaagatccagaaaggatctgtttttctagaCCGAACCTGGATAGTATAATTTTC              |                      | This study |
|                                                                  | IMEoriT_3km                                 | aatctgcctcctcatcctcttcatcctctctagaGTCTATCGCCCTCGCATTAG                |                      | This study |
|                                                                  | IMEoriT_4                                   | GGAGCTCAATTTCTTCGTTTC                                                 |                      | This study |
|                                                                  | aphaA3_F                                    | GCGATCCTAGAGAGGATGAAGAGGATGAGGAGGCAG                                  |                      | This study |
|                                                                  | aphaA3Term_R                                | GCGACTCTAGAAAAACACGATCCTTTCTGGATCTTGTTTTTGCTTTTGA<br>GACATCTAAATCTAGG |                      | This study |
| ICE_ <i>Ssal</i> L25_ <i>fda</i> labelling                       |                                             |                                                                       |                      |            |
|                                                                  | L25_ICE_1                                   | CAGGATTCGCACAATAAGATAG                                                |                      | This study |
|                                                                  | L25_ICE_2Spc                                | gggaaatattcattctaattggCATCCCAGTTGTATGGACT                             |                      | This study |
|                                                                  | L25_ICE_3Spc                                | gtcacgttacgataacttcgGAATACTGCTTCAAAAGATAAG                            |                      | This study |
|                                                                  | L25_ICE_4                                   | TGCACATATAGTTGGTTTAGG                                                 |                      | This study |
|                                                                  | Spec_F                                      | CGAAGTTATCGTAACGTGAC                                                  |                      | This study |
|                                                                  | Spec_R                                      | CCAATTAGAATGAATATTTC                                                  |                      | This study |
| ICES_ <i>fda</i> $\Delta$ int deletion and labelling             |                                             |                                                                       |                      |            |
|                                                                  | Delta_intICE_1                              | GTGGCTCTTCTCAATCACTAAA                                                |                      | This study |
|                                                                  | Delta_intICE_2Cm                            | cgtgttattccaccaatacgcCATTATCCCACCTCTTTAAATCG                          |                      | This study |
|                                                                  | Delta_intICE_3Cm                            | gctatttatcctaagcagagcACCTATCCTTGATACTCTTACACA                         |                      | This study |
|                                                                  | Delta_intICE_4                              | TGATAATGGTTACGCAGTTGG                                                 |                      | This study |
|                                                                  | K7catQ5'                                    | CGTATTGGTGGAATAACACG                                                  |                      | This study |
|                                                                  | K7catQ3'                                    | GCTCTGCTTAGGATAAATAGC                                                 |                      | This study |
| ICES <i>t3</i> $\Delta$ int detection                            |                                             |                                                                       |                      |            |
| <i>attR</i>                                                      | K7catQ5'                                    | CGTATTGGTGGAATAACACG                                                  | 1834                 | This study |
|                                                                  | Delta_intICE_4                              | TGATAATGGTTACGCAGTTGG                                                 |                      | This study |
| IME_ <i>Ssal</i> L25_oriT and flanking region for transformation |                                             |                                                                       |                      |            |
|                                                                  | L25orfKF                                    | GTTGTCCTTATGACCATTAT                                                  |                      | This study |
|                                                                  | L25orfJR                                    | CACACCGTTGATGTATTC                                                    |                      | This study |
| IME_ <i>Ssal</i> L25_oriT $\Delta$ rel deletion                  |                                             |                                                                       |                      |            |

|                                                         |                     |                                           |      |            |
|---------------------------------------------------------|---------------------|-------------------------------------------|------|------------|
|                                                         | Delta_relIME_1      | <b>GGGCGGCCGCTAACAATCTCCTCAAGTC</b>       |      | This study |
|                                                         | Delta_relIME_2      | GATACTATCTTCATCAATCAT                     |      | This study |
|                                                         | Delta_relIME_3      | atgattgatgaagatagatcGAATTCCTAGAATTTACTAGT |      | This study |
|                                                         | Delta_relIME_4      | <b>CGGGGCCCAATCTGGTCTCTAATACTG</b>        |      | This study |
| Detection of ICEs and IMEs integrated and excised forms |                     |                                           |      |            |
| ICE_SsalL11_fda                                         |                     |                                           |      |            |
| <i>attL</i>                                             | attBfdaSsal_F       | GCCCAACCAAATAAACAATAAAA                   | 305  | [43]       |
|                                                         | attlSt3_R           | CGGTGTAATGGGAAGTATGG                      |      | [30]       |
| <i>attR</i>                                             | intlCESt3-fda_F     | ACCTATACTTGATACTCTTACACA                  | 951  | This study |
|                                                         | L25_intlICE4        | TGATAATGGTTACGCAGTTGG                     |      | This study |
| <i>attI</i>                                             | intlCESt3-fda_F     | ACCTATACTTGATACTCTTACACA                  | 153  | This study |
|                                                         | attlSt3_R           | CGGTGTAATGGGAAGTATGG                      |      | [30]       |
| <i>attB</i>                                             | attBfdaSsal_F       | GCCCAACCAAATAAACAATAAAA                   | 1084 | [43]       |
|                                                         | L25_intlICE4        | TGATAATGGTTACGCAGTTGG                     |      | This study |
| IME_SsalL11_oriT                                        |                     |                                           |      |            |
| <i>attL</i>                                             | CP ICE Ssa2_F       | GTCTTTATCATCTTTGCCAT                      | 1206 | This study |
|                                                         | L11-IMEcds32_R      | AACAATTATCCGATTTGGAAG                     |      | This study |
| <i>attR</i>                                             | intlIME_oriT_F      | CTGCTCTTTATTGGGAAG                        | 759  | This study |
|                                                         | rellCE_R            | GGCCTGTTTGTTTTCTGA                        |      | This study |
| <i>attI</i>                                             | L11-IMEcds32_R      | AACAATTATCCGATTTGGAAG                     | 1097 | This study |
|                                                         | intlIME_oriT_F      | CTGCTCTTTATTGGGAAG                        |      | This study |
| <i>attB</i>                                             | CP ICE Ssa2_F       | GTCTTTATCATCTTTGCCAT                      | 890  | This study |
|                                                         | rellCE_R            | GGCCTGTTTGTTTTCTGA                        |      | This study |
| ICE_SsalL25_fda                                         |                     |                                           |      |            |
| <i>attL</i>                                             | attBfdaSsal_F (1)   | GCCCAACCAAATAAACAATAAAA                   | 442  | [43]       |
|                                                         | attlSt3_R (2)       | CGGTGTAATGGGAAGTATGG                      |      | [30]       |
| <i>attR</i>                                             | intlCESt3-fda_F (7) | ACCTATACTTGATACTCTTACACA                  | 951  | This study |
|                                                         | L25_intlICE4 (8)    | TGATAATGGTTACGCAGTTGG                     |      | This study |
| <i>attI</i>                                             | intlCESt3-F (7)     | AGGGCTTTCTGACGAATTAG                      | 891  | This study |
|                                                         | attlSt3_R (2)       | CGGTGTAATGGGAAGTATGG                      |      | [30]       |
| <i>attB</i>                                             | attBfdaSsal_F (1)   | GCCCAACCAAATAAACAATAAAA                   | 1206 | [43]       |
|                                                         | L25_intlICE4 (8)    | TGATAATGGTTACGCAGTTGG                     |      | This study |
| <i>var_L25</i>                                          | L25varICE_F         | CGAAAGGAGATCAGTATTAG                      | 724  | This study |

|                  |                    |                         |      |            |
|------------------|--------------------|-------------------------|------|------------|
| IME_SsalL25_oriT | L25varICER         | GGCTAGAACCAGAAATAAA     |      | This study |
| <i>attL</i>      | CP ICE Ssa2_F (3)  | GTCTTTATCATCTTTGCCAT    | 1277 | This study |
|                  | L25-IMEcds20_R (4) | GTATTCAATGTTCCGCTATG    |      | This study |
| <i>attR</i>      | IME_oriT_F (5)     | TACATTCAACCAAAAGGT      | 487  | This study |
|                  | rellCE_R (6)       | GGCCTGTTTGTTTTCTGA      |      | This study |
| <i>attI</i>      | IME_oriT_F (5)     | TACATTCAACCAAAAGGT      | 417  | This study |
|                  | IME_oriT_R (4)     | TGGTAGCTTTTTGGTAGC      |      | This study |
| <i>attB</i>      | rellCE_R (6)       | GGCCTGTTTGTTTTCTGA      | 921  | This study |
|                  | CP ICE Ssa2_F (3)  | GTCTTTATCATCTTTGCCAT    |      | This study |
| ICE_SsalL45_rpsI |                    |                         |      |            |
| <i>attL</i>      | N20cds18_F         | CCAAGCCGTCGTCATAATAG    | 1173 | [43]       |
|                  | JIMcds19_F         | TTCTGGTTGGGATCGTTATG    |      | This study |
| <i>attR</i>      | IntRpsI_F1         | TAWTCWGARGCHYTWACKCATAG | 297  | This study |
|                  | RpsI_F             | CAGACCTTCGTCTCGTTATC    |      | This study |
| <i>attI</i>      | IntRpsI_F1         | TAWTCWGARGCHYTWACKCATAG | 331  | This study |
|                  | JIMcds19_F         | TTCTGGTTGGGATCGTTATG    |      | This study |
| <i>attB</i>      | N20cds18_F         | CCAAGCCGTCGTCATAATAG    | 1139 | [43]       |
|                  | RpsI_F             | CAGACCTTCGTCTCGTTATC    |      | This study |
| IME_SsalL45_oriT |                    |                         |      |            |
| <i>attL</i>      | CP ICE Ssa2_F      | GTCTTTATCATCTTTGCCAT    | 1014 | This study |
|                  | L45-IMEcds40_R     | GCAATCAATACTCCAACAAG    |      | This study |
| <i>attR</i>      | intIME_oriT_F      | CTGCTCTTTATTGGGAAG      | 759  | This study |
|                  | rellCE_R           | GGCCTGTTTGTTTTCTGA      |      | This study |
| <i>attI</i>      | intIME_oriT_F      | CTGCTCTTTATTGGGAAG      | 902  | This study |
|                  | L45-IMEcds40_R     | GCAATCAATACTCCAACAAG    |      | This study |
| <i>attB</i>      | CP ICE Ssa2_F      | GTCTTTATCATCTTTGCCAT    | 899  | This study |
|                  | rellCE_R           | GGCCTGTTTGTTTTCTGA      |      | This study |
| ICE_SsalF1-4_fda |                    |                         |      |            |
| <i>attR</i>      | catQ1              | TAGAAAGCCATACTTTGAGC    | 1883 | This study |
|                  | L25_intICE4        | TGATAATGGTTACGCAGTTGG   |      | This study |
| <i>attI</i>      | catQ1              | TAGAAAGCCATACTTTGAGC    | 1103 | This study |
|                  | attISt3_R          | CGGTGTAATGGGAAGTATGG    |      | This study |

|                                                     |                              |                          |     |            |
|-----------------------------------------------------|------------------------------|--------------------------|-----|------------|
| ICES <sub>t3</sub>                                  |                              |                          |     |            |
| <i>attL</i>                                         | 132.3                        | GGACTACTAAGAGAACAT       | 273 | [22]       |
|                                                     | attIS <sub>t3</sub> _R       | CGGTGTAATGGGAAGTATGG     |     | This study |
| <i>attR</i>                                         | intICES <sub>t3</sub> -fda_F | ACCTATACTTGATACTCTTACACA | 227 | This study |
|                                                     | attBS <sub>t3</sub> _R       | CTCTTCGACCCACGTAAATTC    |     | This study |
| <i>attI</i>                                         | attIS <sub>t3</sub> _R       | CGGTGTAATGGGAAGTATGG     | 887 | This study |
|                                                     | attBS <sub>t3</sub> _R       | CTCTTCGACCCACGTAAATTC    |     | This study |
| <i>attB</i>                                         | 132.3                        | GGACTACTAAGAGAACAT       | 361 | [22]       |
|                                                     | 131.2                        | TGTTGCTGAATACGAAGC       |     | [22]       |
| <i>ermB</i> in <i>ΔepsE S. thermophilus</i> strains |                              |                          |     |            |
|                                                     | EG940                        | TGTAATTAAGAAGGAGTGA      | 766 | [24]       |
|                                                     | EG941                        | TAGAATTATTCCTCCCGT       |     | [24]       |

The primer sequences are capitalized when the sequence is complementary to the amplified region. Lower case letters are complementary to a primer allowing the amplified region to overlap. Bold letters indicate the restriction sites *Apa*I and *Not*I (underlined) and extra nucleotides to ensure optimal digestion of PCR amplified region by restriction enzymes prior to cloning in plasmid pG+host9 [23].
