# Supplementary material for: Mobilization of IMEs Integrated in the oriT of ICEs Involves Their Own Relaxase Belonging to the Rep-Trans Family of Proteins
Source: MDPI journal article supplement (doi:10.3390/genes11091004), 2020-08-26
Supplement: s1 [file s1]

**Table S3:** Summary of mating experiments. Transfer frequencies (of ICE or IME) are indicated as transconjugant per donor cell. The detection level for *ICEst3* and its mutants and *IME\_SsalL25\_oriT* and its mutants are  $10^{-6}$  and  $10^{-7}$  respectively so when the frequency was below this detection level, ND ("not detected") is indicated. If the donor strain does not carry the *IME\_SsalL25\_oriT* or if ICE transconjugants cannot be identified due to the presence of a resident ICE in the recipient strain, it has been indicated in the table as "-". Mating pairs not tested were left empty.

| Donor strains                                            | Recipient strains                                  |                                                    |                                                          |                                                    |
|----------------------------------------------------------|----------------------------------------------------|----------------------------------------------------|----------------------------------------------------------|----------------------------------------------------|
|                                                          | LMG18311 $\Delta epsE$                             |                                                    | LMG18311 $\Delta epsE$<br>( <i>ICEst3</i> $\Delta int$ ) |                                                    |
|                                                          | ICE                                                | IME                                                | ICE                                                      | IME                                                |
| LMG18311( <i>ICEst3</i> )                                | $2.3 \times 10^{-4}$<br>$\pm 0.8 \times 10^{-4}$ * | -                                                  |                                                          |                                                    |
| LMG18311( <i>ICEst3::IME_SsalL25_oriT</i> )              | $3.3 \times 10^{-4}$<br>$\pm 1.3 \times 10^{-4}$ * | $3.1 \times 10^{-6}$<br>$\pm 1.5 \times 10^{-6}$ * | -                                                        | $9.3 \times 10^{-6}$<br>$\pm 6.5 \times 10^{-6}$ * |
| LMG18311( <i>ICEst3</i> $\Delta int$ )                   | ND                                                 | -                                                  |                                                          |                                                    |
| LMG18311( <i>ICEst3</i> $\Delta int::IME_SsalL25_oriT$ ) | ND                                                 | ND                                                 | -                                                        | $4.8 \times 10^{-6}$<br>$\pm 4.0 \times 10^{-6}$ * |
| LMG18311( <i>ICEst3</i> $\Delta rel$ )                   | ND                                                 | -                                                  |                                                          |                                                    |
| LMG18311( <i>ICEst3</i> $\Delta rel::IME_SsalL25_oriT$ ) | ND                                                 | ND                                                 |                                                          |                                                    |
| LMG18311( <i>ICEst3::IME_SsalL25_oriT</i> $\Delta rel$ ) | $3.5 \times 10^{-4}$<br>$\pm 2.0 \times 10^{-4}$ * | ND                                                 | -                                                        | ND                                                 |

\* transconjugants per donor cell
