# Supplementary material for: Mobilization of IMEs Integrated in the oriT of ICEs Involves Their Own Relaxase Belonging to the Rep-Trans Family of Proteins
Source: MDPI journal article supplement (doi:10.3390/genes11091004), 2020-08-26
Supplement: s1 [file s1]

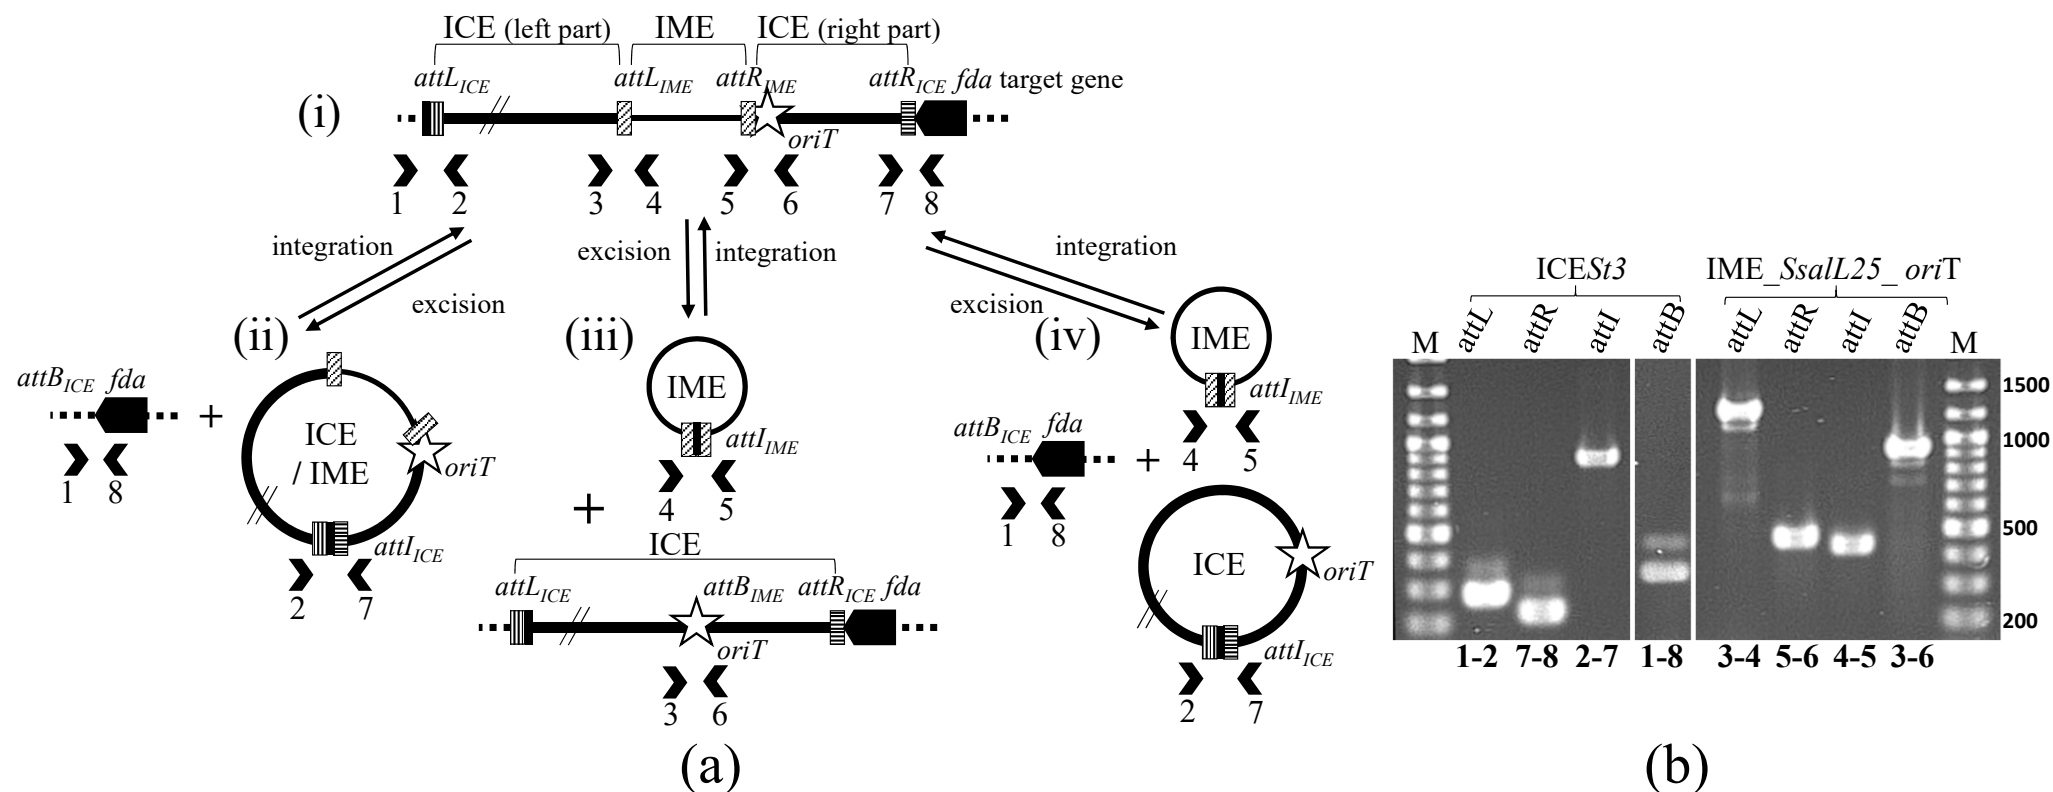

**Figure S2:** Excision of IME\_*Ssal*L25\_*oriT* and its hosting ICE<sub>St3</sub> in *S. thermophilus* LMG18311. **(a)** Diagram showing the localization of PCR primers (numbered chevrons) used to detect (i) integrated forms of elements (*attR* and *attL* for right and left junctions, respectively) and excised forms (*attI* for circular form of the integrative elements and *attB* for the bacterial empty site) if (ii) the ICE/IME composite element excises, (iii) only the IME excises or (iv) both elements excise separately; **(b)** PCR products obtained with the primer pairs (numbers indicated at the bottom of the gel) when analyzing excision of IME\_*Ssal*L25\_*oriT* and of its hosting ICE (ICE\_*Ssal*L25\_*fda*). The sizes of the PCR fragments were confirmed by parallel migration of a DNA ladder (M for marker on the figure). The primers pairs used for these amplifications and expected sequence lengths are listed in Table S1.
