# Supplementary material for: Mobilization of IMEs Integrated in the oriT of ICEs Involves Their Own Relaxase Belonging to the Rep-Trans Family of Proteins
Source: Genes (Basel). 2020 Aug 26;11(9):1004. doi: 10.3390/genes11091004 (PMC7563843; doi:10.3390/genes11091004)
Supplement: Supplementary file 1 [file genes-11-01004-s001.zip]

Archive with 6 entries (6 files):
- Figure S1 Phylogenetic tree integrases.pdf
- Figure S2.pdf
- Figure S3 Phylogenetic tree relaxases.pdf
- Table S1 primers.pdf
- Table S2 IME_oriTs.xlsx
- Table S3.pdf
