# Supplementary material for: Mobilization of IMEs Integrated in the oriT of ICEs Involves Their Own Relaxase Belonging to the Rep-Trans Family of Proteins
Source: Genes (Basel). 2020 Aug 26;11(9):1004. doi: 10.3390/genes11091004 (PMC7563843; doi:10.3390/genes11091004)
Supplement: Supplementary file 1 [file genes-11-01004-s001.zip › Table S2 IME_oriTs.xlsx]

## Sheet: Feuil2
Bacterial species	Strain name	Relaxase GenBank ID	% of aa identity with relaxase of IME_SagLMG15084_oriT	Identical to relaxase of another IME	Chromosomal location of the IME (those appearing in Figure 1 are in bold)	% of nucleic identity (on whole sequence) with IMEs shown on figure 1	Resistance genes	Other cargo genes (E value for domain prediction)1	Other cargo genes (E value for domain prediction)2	Other cargo genes (E value for domain prediction)3	Reference
Staphylococcus aureus	ER01570.3	WP_002273084.1	100	IME_SagLMG15084	into oriT of ICE6013-related element		lsa(C)				This work
Streptococcus agalactiae	18RS21	WP_000799122.1	100	IME_SagLMG15084	into oriT of an ICESt3-related element (integrated in a tRNALys gene)	IME_SagLMG15084_oriT (88.3%)	merA (TIGR02053, E=0e00)				[14]
Streptococcus agalactiae	214	WP_002273084.1	98	IME_SagGB00984	into oriT of an ICESt3-related element (integrated in a tRNALys gene)	IME_SagGB00984_oriT (99.5%)	lsa(C) variant 1	competence regulator TfoX_N (cl17592, E=10e-14)
Streptococcus agalactiae	CCH206800172				into oriT of an ICESt3-related element (integrated in a tRNALys gene)	not available	lsa(C)				[17]
Streptococcus agalactiae	CCH208800620				into oriT of an ICESt3-related element (integrated in rpsI)	not available	lsa(C)				[17]
Streptococcus agalactiae	CCH210801006				into oriT of an ICESt3-related element (integrated in a tRNALys gene)	not available	lsa(C)				[17]
Streptococcus agalactiae	DK-PW-162	WP_002273084.1	98	IME_SagGB00984	into oriT of an ICESt3-related element (integrated in a tRNALys gene)	IME_SagGB00984_oriT (99.5%)	lsa(C) variant 1	competence regulator TfoX_N (cl17592, E=10e-14)
Streptococcus agalactiae	GB00957	WP_017771664.1	92	IME_SagUCN70	into oriT of Tn5801 (Tn916 family)	IME_SagUCN70_oriT (99.9%)	lsa(C)				[14]
Streptococcus agalactiae	GB00984	WP_000799121.1	98.182		into oriT of Tn916		lsa(C) variant 1	competence regulator TfoX_N (cl17592, E=10e-14)			[14]
Streptococcus agalactiae	GB-NI-015	WP_000799121.1	98.182	IME_SagGB00984	into oriT of an ICESt3-related element (integrated in a tRNALys gene)	IME_SagGB00984_oriT (99.9%)	lsa(C) variant 1	competence regulator TfoX_N (cl17592, E=10e-14)			[17]
Streptococcus agalactiae	GCH49	WP_000799121.1	98.182	IME_SagGB00984	into oriT of an ICESt3-related element (integrated in a tRNALys gene)	IME_SagGB00984_oriT (99.9%)	lsa(C) variant 1	competence regulator TfoX_N (cl17592, E=10e-14)			This work
Streptococcus agalactiae	GNUCH-Saga-18	WP_000799121.1	98.182	IME_SagGB00984	into oriT of an ICESt3-related element (integrated in a tRNALys gene)	IME_SagGB00984_oriT (99.5%)	lsa(C) variant 1	competence regulator TfoX_N (cl17592, E=10e-14)			This work
Streptococcus agalactiae	GNUCH-Saga-21	WP_000799121.1	98.182	IME_SagGB00984	into oriT of an ICESt3-related element (integrated in a tRNALys gene)	IME_SagGB00984_oriT (99.5%)	lsa(C) variant 1	competence regulator TfoX_N (cl17592, E=10e-14)			This work
Streptococcus agalactiae	IMMI409	WP_002273084.1	98	IME_SagGB00984	into oriT of an ICESt3-related element (integrated in a tRNALys gene)	IME_SagGB00984_oriT (99.5%)	lsa(C) variant 1	competence regulator TfoX_N (cl17592, E=10e-14)
Streptococcus agalactiae	LMG15084	EPW57073.1	100	IME_SagLMG15084	into oriT of an ICESt3-related element (integrated in a tRNALys gene)		merA (TIGR02053, E=0e00)				This work
Streptococcus agalactiae	NCTC11079	WP_002273084.1	100	IME_SagLMG15084	into oriT of an ICESt3-related element (integrated in a tRNALys gene)	IME_SagLMG15084_oriT (88.3%)	merA (TIGR02053, E=0e00)
Streptococcus agalactiae	NND003	WP_002273084.1	98	IME_SagGB00984	into oriT of an ICESt3-related element (integrated in a tRNALys gene)	IME_SagGB00984_oriT (99.5%)	lsa(C) variant 1	competence regulator TfoX_N (cl17592, E=10e-14)
Streptococcus agalactiae	NNA004 118	WP_002273084.1	98	IME_SagGB00984	into oriT of an ICESt3-related element (integrated in a tRNALys gene)	IME_SagGB00984_oriT (99.5%)	lsa(C) variant 1	competence regulator TfoX_N (cl17592, E=10e-14)
Streptococcus agalactiae	SG-M25	WP_000799121.1	98.182	IME_SagGB00984	into oriT of an ICESt3-related element (integrated in a tRNALys gene)	IME_SagGB00984_oriT (99.9%)	lsa(C) variant 1	competence regulator TfoX_N (cl17592, E=10e-14)			This work
Streptococcus agalactiae	UCN70	WP_017771664.1	92.355		not available		lsa(C)				[14, 15]
Streptococcus anginosus	NCTC11064	WP_138099492.1	90.606		into oriT of an ICESt3-related element (integrated in rpsI)			alkylation repair protein (Pfam08713, E=10e-16)			This work
Streptococcus anginosus	UMB0050	WP_101750287.1	96.667	IME_SanUMB595	into oriT of Tn916						This work
Streptococcus anginosus	UMB595	WP_101750287.1	96.667		into oriT of Tn916	IME_SanUMB0050 (100%)					This work
Streptococcus australis	A13	WP_061564365.1	96.636	IME_A12	into oriT of an ICESt3-related element (integrated in rpsI)						This work
Streptococcus constellatus	KCOM1650	WP_017771664.1	92.355	IME_SagUCN70	into oriT of an IME integrated in rpmG						This work
Streptococcus cristatus	BCA6	WP_045769334.1	97.879	IME_SsalUC3162	other	IME_SagGB00984_oriT (98.0%)	lsa(C) variant 1	competence regulator TfoX_N (cl17592, E=10e-14)			This work
Streptococcus mitis	A2	CDG57865.1	98.182		into oriT of Tn916						[14]
Streptococcus mitis	DE0498	WP_002273084.1	98	IME_SagGB00984	into oriT of Tn916	IME_SagGB00984_oriT (99.1%)	lsa(C) variant 1	competence regulator TfoX_N (cl17592, E=10e-14)
Streptococcus mutans	11VS1	WP_002278366.1	94.242		other						[14]
Streptococcus mutans	3SN1	WP_002273084.1	98.788		other						[14]
Streptococcus oralis	COL85/1862	WP_045593960.1	97.576		into oriT of an ICESt3-related element (integrated in rpmG)						This work
Streptococcus oralis	BCA18-D8894	WP_002273084.1	100	IME_SagLMG15084	into oriT of Tn916	IME_SaurER01570.3_oriT (99.9%)	lsa(C)
Streptococcus parasanguinis	BIOML-A11	WP_049502653.1	91.212	IME_SsalBIOML-A8	into oriT of an ICESt3-related element (integrated in ebfC)	IME_SagUCN70_oriT (98.3%)	lsa(C)				This work
Streptococcus parasanguinis	BIOML-A13	WP_049502653.1	91.212	IME_SsalBIOML-A8	into oriT of an ICESt3-related element (integrated in ebfC)	IME_SagUCN70_oriT (98.3%)	lsa(C)				This work
Streptococcus parasanguinis	BIOML-A15	WP_049502653.1	91.212	IME_SsalBIOML-A8	into oriT of an ICESt3-related element (integrated in ebfC)	IME_SagUCN70_oriT (98.3%)	lsa(C)				This work
Streptococcus parasanguinis	BIOML-A17	WP_049502653.1	91.212	IME_SsalBIOML-A8	into oriT of an ICESt3-related element (integrated in ebfC)	IME_SagUCN70_oriT (98.3%)	lsa(C)				This work
Streptococcus parasanguinis	CC87K	WP_023919696.1	98.485	IME_AM28-20	other	not available					This work
Streptococcus pneumoniae	GPSC16	VLQ82319.1	90.52		into oriT of Tn916						This work
Streptococcus pneumoniae	GPSC47	VPE55696.1	90.826		into oriT of Tn916	IME_SpnGPSC16_oriT (99.8%)					This work
Streptococcus pseudopneumoniae	277_SPE	WP_017771664.1	92	IME_SagUCN70	into oriT of Tn916	IME_SagUCN70_oriT (98.8%)	lsa(C) variant 2
Streptococcus pseudopneumoniae	380_SPE	WP_017771664.1	92	IME_SagUCN70	into oriT of Tn916	IME_SagUCN70_oriT (98.8%)	lsa(C) variant 2
Streptococcus salivarius	1001175st1H3	WP_049502653.1	91	IME_SsalBIOML-A8	into oriT of an ICESt3-related element (integrated in rpmG)	IME_SagUCN70_oriT (98.3%)	lsa(C)				This work
Streptococcus salivarius	34-09	WP_073686229.1	97		other	IME_SsalL61_oriT (94.2%)					This work
Streptococcus salivarius	39-07	WP_073688979.1	93		other			SMC protein (TIGR02168, E=10e-10) and DUF4297 domain protein (cl16639, E=10e-4)			This work
Streptococcus salivarius	BIOML-A8	WP_049502653.1	91.212		into oriT of an ICESt3-related element (integrated in fda)	IME_SagUCN70_oriT (98.3%)	lsa(C)				This work
Streptococcus salivarius	DE0578	WP_017771664.1	92	IME_SagUCN70	into oriT of an ICESt3-related element (integrated in rpsI)	IME_SagUCN70_oriT (99.9%)	lsa(C)
Streptococcus salivarius	HS0302	WP_049502653.1	91	IME_SsalBIOML-A8	into oriT of Tn916	IME_SagUCN70_oriT (98.4%)	lsa(C)				This work
Streptococcus salivarius	L11				into oriT of an ICESt3-related element (integrated in fda)			competence regulator TfoX_N (cl17592, E=10e-14)			This work, [18]
Streptococcus salivarius	L25				into oriT of an ICESt3-related element (integrated in fda)						This work, [18]
Streptococcus salivarius	L45				into oriT of an ICESt3-related element (integrated in rpsI)						This work, [18]
Streptococcus salivarius	L61				into oriT of an ICESt3-related element (integrated in fda)						This work, [18]
Streptococcus salivarius	UC3162	WP_045769334.1	97.879		into oriT of an ICESt3-related element (integrated in rpmG)						This work
Streptococcus sanguinis	2908	WP_080983542.1	96.33		other						This work
Streptococcus sp.	A12	WP_061564365.1	96.636		into oriT of an ICESt3-related element (integrated in rpsI)			SMC protein (TIGR02168, E=10e-10) and DUF4297 domain protein (cl16639, E=10e-4)	lantibiotic protection ABC transporter (TIGR03733 & E=10e-70, TIGR03732 & E=10e-90, TIGR03740 & E=10e-139)	two-component system (signal transduction histidine kinase COG0642 E=10e-35, DNA-binding response regulator OmpR family COG0745 E=10e-68)	This work
Streptococcus sp.	AM28-20	WP_023919696.1	98.485		into oriT of Tn916		ABC-type multidrug transport system (COG1132, E=10e-81)				This work
Streptococcus sp.	bin_32	RKW01147.1	97.576		not available	not available					This work
Streptococcus sp.	C150	WP_008534370.1	96.667		other						[14]
Streptococcus sp.	FDAARGOS_522	WP_000799122.1	100	IME_SagLMG15084	into oriT of Tn916	IME_SaurER01570.3_oriT (100%)	lsa(C)				This work
Streptococcus sp.	HMSC061D10	WP_000799122.1	100	IME_SagLMG15084	into oriT of Tn916	IME_SaurER01570.3_oriT (100%)	lsa(C)				This work
Streptococcus sp.	HMSC066E07	WP_070670852.1	93.636		into oriT of an ICESt3-related element (integrated in rpsI)						This work
Streptococcus sp.	HMSC078H12	WP_070654576.1	93.939		into oriT of an ICESt3-related element (integrated in fda)	IME_SsalL25_oriT (95.6%)					This work
Streptococcus sp.	SR1	WP_017771664.1	92.355	IME_SagUCN70	into oriT of Tn916	IME_SagUCN70_oriT (99.9%)	lsa(C)				This work
Streptococcus sp.	SR4	WP_017771664.1	92.355	IME_SagUCN70	into oriT of Tn916	IME_SagUCN70_oriT (99.9%)	lsa(C)				This work
Streptococcus thermophilus	MTH17CL396	WP_084830922.1	92.424		into oriT of an ICESt3-related element (integrated in fda)						This work
